# Supplementary material for: The Implementation of a Risk-Based Assessment Approach by the South African Health Products Regulatory Authority (SAHPRA)
Source: PubMed Central journal article supplement — Pharmaceut Med. 2023 Jan 4;37(1):71–91. doi: 10.1007/s40290-022-00452-w (PMC9877048; doi:10.1007/s40290-022-00452-w), 2023-01-04
Supplement: 40290_2022_452_MOESM2_ESM.pdf [file 40290_2022_452_MOESM2_ESM.pdf]

**The implementation of a risk-based assessment approach by the South African Health Products  
Authority (SAHPRA)**

**Pharmaceutical Medicine**

**Lerato Moeti<sup>1,2</sup>, Madira Litedu<sup>1</sup>, Jacques Joubert<sup>2</sup>**

<sup>1</sup>South African Health Products Regulatory Authority (SAHPRA), Pretoria, South Africa.

<sup>2</sup>University of the Western Cape, School of Pharmacy, Cape Town, South Africa.

Corresponding Author: [jjoubert@uwc.ac.za](mailto:jjoubert@uwc.ac.za)

School of Pharmacy, University of the Western Cape, Robert Sobukwe Road, Bellville 7535, Cape  
Town, South Africa.

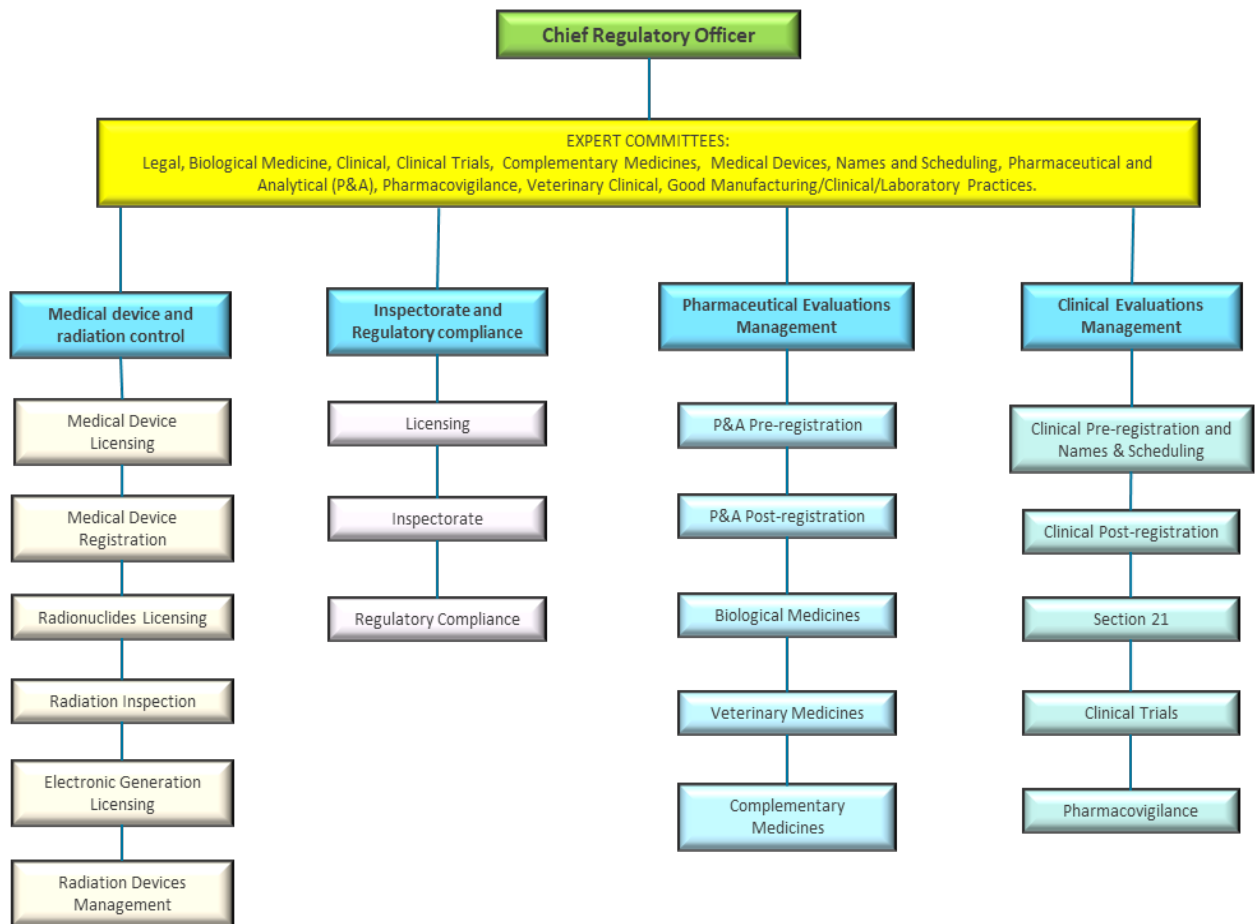

**Figure S1b:** The SAHPRA structure within the office of the Chief Regulatory Officer (CRO).
